# Supplementary material for: The Ancient and Evolved Mouse Sperm-Associated Antigen 6 Genes Have Different Biologic Functions In Vivo
Source: MDPI journal article supplement (doi:10.3390/cells11030336), 2022-01-20
Supplement: s1 [file s1]

|                |      |                                                               |      |
|----------------|------|---------------------------------------------------------------|------|
| Spag6 (Chr2)   | 1    | ATGAGCCAGCGCAGGTGCTGCAAGTGTTCGAGCTGTACCAAGACGCCCGGACCCGGTTT   | 60   |
| Spag6l (Chr16) | 1    | ATGAGCCAGCGCAGGTGCTGCAAGTGTTCGAGCAGTACCAAGACGCCCGGACCGCAATTC  | 60   |
| Spag6 (Chr2)   | 61   | GTGCAGATGTTGGCGGAGCAGGCGACCAACCCAGAACATCGAGACACTGCGAAGTGG     | 120  |
| Spag6l (Chr16) | 61   | GTGCAGATGTTGGCGAGAGCTGGCGACAAGACCCAAACATCGAAACGCTGCGAAGTGA    | 120  |
| Spag6 (Chr2)   | 121  | GGTATAATGTCCTTTGCTGAGGCGCTCTCTCTGCGACGTGGTCCCAACATTGACGAGACT  | 180  |
| Spag6l (Chr16) | 121  | GGTGTAAATGTCCTTTGCTAAGGCGCGCTCTCTCTGGATGGTCCCAACATTCACAGACT   | 180  |
| Spag6 (Chr2)   | 181  | GCTGCCTTGGCTCTGGGGAGGCTGGCCAACTACACGATGACTTAGCAGAGCAGTCTGTG   | 240  |
| Spag6l (Chr16) | 181  | GCAGCTTTGGCTCTGGGGAGACTGGCCAAATACATGATGACTTAGCAGAGCAGTCTGTG   | 240  |
| Spag6 (Chr2)   | 241  | AAGGGTGACATTCTTCCACAGCTTGTGTATTATTGGCAGAGCAGAAATGCTGTCTACAAG  | 300  |
| Spag6l (Chr16) | 241  | AAAGGTGACATTCTTCCACAGCTTGTATTATTATTGGCAGAACAAATGTTTTTACAAG    | 300  |
| Spag6 (Chr2)   | 301  | AAGGCAGCTGCGTTTGTGCTGCGAGCGGTTGGTAAACACTCTCCTCAGCTGGCGCAGGCC  | 360  |
| Spag6l (Chr16) | 301  | AAGGCAGCTGCGTTTGTGTTGAGAGCAGTTGGGAACACTCTCCTCAGCTGGGCCAGGCC   | 360  |
| Spag6 (Chr2)   | 361  | ACAGTTGACTGTGGTGCCCTGGACTCACTGGTGATCTGCTTGGAAAGTTTGGACCTGGA   | 420  |
| Spag6l (Chr16) | 361  | ATAGTTGACTGCGGGAGCTCTGGATACACTGGTGATCTGCTTGGAGGATTTGACCCCTGGG | 420  |
| Spag6 (Chr2)   | 421  | GTCAGGAGGCTGCGAGCTGGGCACTTGCATATATTGCAAGGCATAATGCGAGAACTGCG   | 480  |
| Spag6l (Chr16) | 421  | GTCAGGAGGCTGCGAGCTGGGCACTCGGATACATTGCAAGCACACACAGAAATTATCT    | 480  |
| Spag6 (Chr2)   | 481  | CAAGCTGTGGTGATGCGGGAGCTGTTCCCTTTTAGTCTCTGTATCCAGGAGCCGAG      | 540  |
| Spag6l (Chr16) | 481  | CAAGCCGTGGTGATGCGAGGCAATTCCCTTTTAGTCTTTGTATCCAGGAGCCAGAA      | 540  |
| Spag6 (Chr2)   | 541  | ACTGCTTTGAAAGGATCGCTGCTCGGCCCTCAGTGATATTTCAAAGCACTCCCCAGAG    | 600  |
| Spag6l (Chr16) | 541  | ATTGCTTTGAAAGGATCGCTGCTCGGCCCTCAGTGATATCTCAAAGCACTCCCCAGAG    | 600  |
| Spag6 (Chr2)   | 601  | TTAGCACAAACGGTGGTGATGTAGGAGCTATTGCTCACTTAGCCAGATGATCCTCAAC    | 660  |
| Spag6l (Chr16) | 601  | TTAGCACAGAGCGTGGTGAGCGAGGAGCTATTGCTCACTTAGCCAGATGATCCTCAAC    | 660  |
| Spag6 (Chr2)   | 661  | CCCGATGAGAACTGAAGCAGAGGCTCTCTCAGCTCTGAGTCACATGCGAGCACTCG      | 720  |
| Spag6l (Chr16) | 661  | CCTGATGCAAACTGAAGCGCAGGCTCTCTCAGCTCTCAGTCAGATTGCAAGGATCTCT    | 720  |
| Spag6 (Chr2)   | 721  | GTGGACCTGGCAGAGATGGTTGTGGAGGAGAGATTTTCCAGTTGTTCTCACCTGTCTG    | 780  |
| Spag6l (Chr16) | 721  | GTGGACTTGGCAGAGATGGTTGTGAAGCAGAGATTTTCCCTGTTGACTTAACCTGCTG    | 780  |
| Spag6 (Chr2)   | 781  | AAGGACAAAGTGAATCTCGTGAAGAAGATGCTGTACTCTGATTAGAGAGATCGCAAAA    | 840  |
| Spag6l (Chr16) | 781  | AAGGACAAAGTGAATATGTGAAGAAAATGCTTGACCTTAATCAGAGAGATTGCAAAA     | 840  |
| Spag6 (Chr2)   | 841  | CATACACGAGGCTCTCGCAGCTGATTGTTAATGCGGAGGTGTGGCTGCCGTGATCGAC    | 900  |
| Spag6l (Chr16) | 841  | CACACGCTGAGCTCTCGCAGCTGATTGTTAATGAGGAGGCGTGGCTGCCGTGATCGAT    | 900  |
| Spag6 (Chr2)   | 901  | TGCATCGGGTCTGCAAAAGGGAACATACGGCTGCGTGGCATCATGATGCTGGGTTACATG  | 960  |
| Spag6l (Chr16) | 901  | TGCATTTGGGTCTGCAAAAGGGAACATACGGCTGCGTGGCATCATGATGCTGGGTTAAGTG | 960  |
| Spag6 (Chr2)   | 961  | GCTGCTCATTTCTGAGAACCTGGCCATGGCGGTGATCATCTCCAGGGGTGACCCCACTTG  | 1020 |
| Spag6l (Chr16) | 961  | GCTGCTCATTTCTGAGAACCTGGCCATGGCGGTGATCATCTCCAGGGGTGATCCCACTTG  | 1020 |
| Spag6 (Chr2)   | 1021 | TCAGACTGCTGTGAGAACCTGGGAGAGATCATATTAAGGCTGGGCTGCTGGGCTCTA     | 1080 |
| Spag6l (Chr16) | 1021 | TCAATCTGCTGTGAGAACCTGGGAGAGATCATATTAAGGCTGCTGCTGGGCTCTTG      | 1080 |
| Spag6 (Chr2)   | 1081 | GGGCAGGTTGGGAGGCACACTCCAGAACATGCTCGGGCTGTGCGCATCAAAACACGTTG   | 1140 |
| Spag6l (Chr16) | 1081 | GGGCAGCTGGGAGGACACACTCCAGAGCATGCCAGGCTGTGGCTGTCAAAACACGCTG    | 1140 |
| Spag6 (Chr2)   | 1141 | CCCGTGTGCTGGCTTTGTACATGTCCCGAGAGGCTCTGAGGACCTGCAAGTGAAGT      | 1200 |
| Spag6l (Chr16) | 1141 | CCAGTCTGCTGCTTTGTACATGTACCGAGAGGCTCTGAGGACCTACAGCTCAAAAGT     | 1200 |
| Spag6 (Chr2)   | 1201 | AAAAAGCCATAAAGAAATATCATCCAAAATGCACCTAOCCTCCCGGCGCTTGAGCCGTTT  | 1260 |
| Spag6l (Chr16) | 1201 | AAAAAGCCATAAAGAAATATCCTTCAGAAATGCACCTAOCCTCCCGGCGCTTGAGCCGTTT | 1260 |
| Spag6 (Chr2)   | 1261 | CTCTATGATGCGCCTCCCAATATCCTGAAGTATGTGCTGGACAGTTCACTAAGGTGCTG   | 1320 |
| Spag6l (Chr16) | 1261 | CTGTACGACGACCTCCCAATATCCTGAACATGTTGTGGGAGTTCACTAAGGTGCTG      | 1320 |
| Spag6 (Chr2)   | 1321 | CCACATGACAGCAAGCTCGTCGGCTTTTGTAAAGTGGTGGACTTAAAAAGATCCAA      | 1380 |
| Spag6l (Chr16) | 1321 | CCACATGACAGCAAGCCCGCGGCTTTTGTGACTAGTGGTGGACTTAAAAAGGTTTCA     | 1380 |
| Spag6 (Chr2)   | 1381 | GAGATCAAGCAGAACCTGGTCCATCCTCCAAGAGTATATCAACAACTCAACAGCTGC     | 1440 |
| Spag6l (Chr16) | 1381 | GAGATAAAGCAGAACAGGCTCTCTCTGAGGAATACATCAACAGCATCAACAAATTGT     | 1440 |
| Spag6 (Chr2)   | 1441 | TACCCAGAGGAATAGTAAGGTACTATTCTCCTGGTACTCAGACATACTTCTGCAAGG     | 1500 |
| Spag6l (Chr16) | 1441 | TACCCAGAGGAATAGTAAGGTATTATTCACTGGTACTCCGATACACTTCTGCAAGG      | 1500 |
| Spag6 (Chr2)   | 1501 | ATCGACAGCTATCAGCCTCTTATTAACTGAACGAAGTATA---TTATAACTCAGATTC    | 1557 |
| Spag6l (Chr16) | 1501 | GTGGACAGCTACCAACACT-----GTGAACAAAGCATATTTTATTCTCTCGGTTTT      | 1554 |
| Spag6 (Chr2)   | 1558 | ACAGGAGAGTAAAGGATAACAATTGTTAA 1585                            |      |
| Spag6l (Chr16) | 1555 | CCAGGAGAGTGTGAATATGATTGTTAA 1582                              |      |

**Supplemental Figure S1. The ancient *Spag6* gene shares high homology with the evolved gene, *Spag6l*.**

*Spag6* and *Spag6l* share high homology in nucleotide sequences. The coding sequences of the two genes were compared. Nucleotide sequence comparison using Basic Local Alignment Search Tool (BLAST) demonstrates high similarity between the two genes.

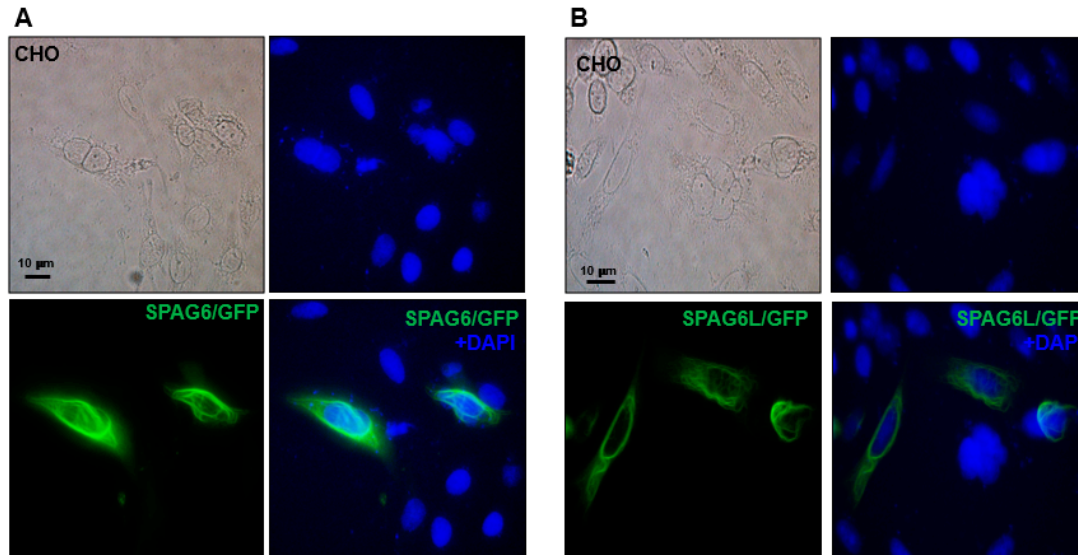

**Supplemental Figure S2. Localization of SPAG6L/GFP in transfected CHO cells.**

The SPAG6/pEGFP-N<sub>2</sub> (A) and SPAG6L/pEGFP-N<sub>2</sub> (B) plasmids were transfected into CHO cells. 48 hrs after transfection, the cells were fixed with 4% paraformaldehyde and mounted with a medium containing DAPI. Images were taken with a fluorescence microscope.

| A                 |     |                                                     |     | B                 |     |                                                     |     |
|-------------------|-----|-----------------------------------------------------|-----|-------------------|-----|-----------------------------------------------------|-----|
| WILD-TYPE         | 1   | ---CCGGTTTGTGCAGATGGTGGCGGAGCAGGCGACCAAAACCCAGAAACA | 47  | <i>Spag6</i> KO   | 1   | ----CGGTTTGTGCAGATGGTGGCGGAGCAGGCGACCAAAACCCAGAAACA | 46  |
| <i>Spag6</i> CDNA | 51  | GACCCGGTTTGTGCAGATGGTGGCGGAGCAGGCGACCAAAACCCAGAAACA | 100 | <i>Spag6</i> CDNA | 51  | GACCCGGTTTGTGCAGATGGTGGCGGAGCAGGCGACCAAAACCCAGAAACA | 100 |
| WILD-TYPE         | 48  | TCGAGACACTGCAGAATGCGGGTATAATGTCTTTGCTGAGGCCCTCTTCTT | 97  | <i>Spag6</i> KO   | 47  | TCGAGACACTGCAGAATGCGGGTATAATGTCTTTGCTGAGGCCCTCTTCTT | 96  |
| <i>Spag6</i> CDNA | 101 | TCGAGACACTGCAGAATGCGGGTATAATGTCTTTGCTGAGGCCCTCTTCTT | 150 | <i>Spag6</i> CDNA | 101 | TCGAGACACTGCAGAATGCGGGTATAATGTCTTTGCTGAGGCCCTCTTCTT | 150 |
| WILD-TYPE         | 98  | CTGGAGCTGGTCCCAACCATTCAGCAGACTGCTGCTTGGCTCTGGGGAG   | 147 | <i>Spag6</i> KO   | 97  | CTGGAGCTGGTCCCAACCATTCAGCAGACTGCTGCTTGGCTCTGGGGAG   | 146 |
| <i>Spag6</i> CDNA | 151 | CTGGAGCTGGTCCCAACCATTCAGCAGACTGCTGCTTGGCTCTGGGGAG   | 200 | <i>Spag6</i> CDNA | 151 | CTGGAGCTGGTCCCAACCATTCAGCAGACTGCTGCTTGGCTCTGGGGAG   | 200 |
| WILD-TYPE         | 148 | GCTGGCCAATCACACGATGACTTAGCAGAGCAGCTGCTGAAGGGTGACA   | 197 | <i>Spag6</i> KO   | 147 | GCTGGCCAATCACACGATGACTTAGCAGAGCAGCTGCTGAAGGGTGACA   | 196 |
| <i>Spag6</i> CDNA | 201 | GCTGGCCAATCACACGATGACTTAGCAGAGCAGCTGCTGAAGGGTGACA   | 250 | <i>Spag6</i> CDNA | 201 | GCTGGCCAATCACACGATGACTTAGCAGAGCAGCTGCTGAAGGGTGACA   | 250 |
| WILD-TYPE         | 198 | TTCTTCCACAGCTTGTGTAATTCATTGGCAGAGCAGAAATGTGTCTACAAG | 247 | <i>Spag6</i> KO   | 197 | TTCTTCCACAGCTTGTGTAATTCATTGGCAGAGCAGAAAT-----       | 234 |
| <i>Spag6</i> CDNA | 251 | TTCTTCCACAGCTTGTGTAATTCATTGGCAGAGCAGAAATGTGTCTACAAG | 30  | <i>Spag6</i> CDNA | 251 | TTCTTCCACAGCTTGTGTAATTCATTGGCAGAGCAGAAATGTGTCTACAAG | 300 |
| WILD-TYPE         | 248 | AAGGCAGCTGCGTTTGTGCTGCGAGCGGTTGGTAAACACTCTCTCAGCT   | 297 | <i>Spag6</i> KO   | 235 | -----                                               | 234 |
| <i>Spag6</i> CDNA | 301 | AAGGCAGCTGCGTTTGTGCTGCGAGCGGTTGGTAAACACTCTCTCAGCT   | 350 | <i>Spag6</i> CDNA | 301 | AAGGCAGCTGCGTTTGTGCTGCGAGCGGTTGGTAAACACTCTCTCAGCT   | 350 |
| WILD-TYPE         | 298 | GGCGCAGGCCACAGTTGACTGTGGTGGCTTGGACTCACTGGTGAATCTGCT | 347 | <i>Spag6</i> KO   | 235 | -----                                               | 234 |
| <i>Spag6</i> CDNA | 351 | GGCGCAGGCCACAGTTGACTGTGGTGGCTTGGACTCACTGGTGAATCTGCT | 400 | <i>Spag6</i> CDNA | 351 | GGCGCAGGCCACAGTTGACTGTGGTGGCTTGGACTCACTGGTGAATCTGCT | 400 |
| WILD-TYPE         | 348 | TGGAAGATTTTGACCTGGATTCAAGGAGGNTGCAGCTGGGTACTTGCA    | 397 | <i>Spag6</i> KO   | 235 | -----                                               | 234 |
| <i>Spag6</i> CDNA | 401 | TGGAAGATTTTGACCTGGATTCAAGGAGGNTGCAGCTGGGTACTTGCA    | 450 | <i>Spag6</i> KO   | 235 | -----                                               | 234 |
| WILD-TYPE         | 398 | TATATTGCAAGGATAATGAGAACTGWCAGCAAGCTGTGGTGGATGCGGG   | 447 | <i>Spag6</i> CDNA | 401 | TGGAAGATTTTGACCTGGATTCAAGGAGGNTGCAGCTGGGTACTTGCA    | 450 |
| <i>Spag6</i> CDNA | 451 | TATATTGCAAGGATAATGAGAACTGTGCAAGCAAGCTGTGGTGGATGCGGG | 500 | <i>Spag6</i> KO   | 235 | -----AACTGTGCAAGCTGTGGTGGATGCGGG                    | 262 |
| WILD-TYPE         | 448 | AGCTGTCCCTCTTNTAGTCTTTGTATCCAGGAGCCCGAATTTGCTNTGN   | 497 | <i>Spag6</i> CDNA | 451 | TATATTGCAAGGATAATGAGAACTGTGCAAGCAAGCTGTGGTGGATGCGGG | 500 |
| <i>Spag6</i> CDNA | 501 | AGCTGTCCCTCTTNTAGTCTTTGTATCCAGGAGCCCGAATTTGCTTTGA   | 550 | <i>Spag6</i> KO   | 263 | AGCTGTCCCTCTTTAGTCTCTGTATCCAGGAGCCCGAATTTGCTTTGA    | 312 |
|                   |     |                                                     |     | <i>Spag6</i> CDNA | 501 | AGCTGTCCCTCTTTAGTCTCTGTATCCAGGAGCCCGAATTTGCTTTGA    | 550 |

C

```

R F V Q M V A E Q A T K P Q N I E T L Q N A G I M S
CGGTTTGTGAGATGGTGGCGAGCGAGCGACCAACCCAGAACATCGAGACTGCGAATGCGGGTATAATGTCT
L L R P L L L D V V P T I Q Q T A A L A L G R L A N
TTGCTGAGGCTCTTCTTCTGGACGTGGTCCCAACCATTCAGCAGACTGCTGCTTGGCTCTGGGAGGCTGGCCAC
Y N D D L A E A V V K G D I L P Q L V F S L A E Q N
TACACGATGACTTAGCAGAGCACTCTGAGGGGTGACATCTTCCACAGCTGTGTATTGATTGGCAGAGCAGAAAT
E Q N N C R K L W W M R E L F L F - S S V S R S P X
AACTGTGCGAGCTGTGGTGGATGGGAGCTGTCTCTTTAGTCTCTGTATCCAGGAGCCCAHACTGCTTGA

```

### Supplemental Figure S3. Examination of exon 4 deletion in *Spag6* KO mice by Sanger sequencing.

The full-length mouse *Spag6* coding regions were amplified by RT-PCR using testicular cDNA from a control mouse and a *Spag6* KO mouse. The two PCR products were sequenced using the forward primer, and the sequencing results were compared to the coding sequence of the mouse *Spag6* cDNA (GenBank: NM\_001001334.2). A. BLAST results using the PCR product from the control mouse; B. BLAST results using the PCR product from the *Spag6* KO mouse. Notice that the control mouse contained an intact exon 4 sequence, but exon 4 was deleted in the KO mouse. C. Analysis of the amino acid sequence of the *Spag6* KO mice. The EMBOSS TranSeq program was used to analyze the amino acid sequence of the *Spag6* KO cDNA. Deletion of exon 4 of mouse *Spag6* resulted in a premature stop codon.

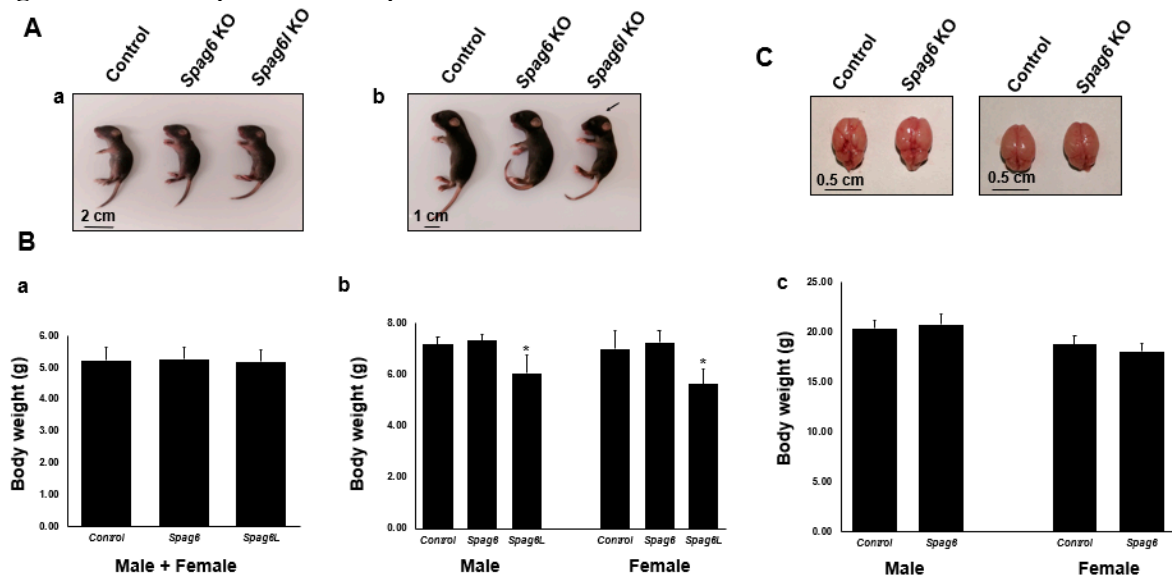

### Supplemental Figure S4. Normal development of *Spag6* KO mice.

A. Representative images of the mice at the indicated ages. Notice that no difference was observed between the control and the *Spag6* KO mice at any of age analyzed. However, the *Spag6L* KO mice

were smaller at two weeks of age. a. One-week-old mice; b. Two-week-old mice. The arrow points to the head of a two-week-old *Spag6l* KO mouse with hydrocephalus.

B. Body weight of the control and *Spag6* KO mice at the indicated ages. Notice that there was no significant difference between the two groups. However, the body weight of the *Spag6l* KO mice was significantly lower at two weeks after birth.  $n=6$ . \*  $P<0.05$  compared to the control mice.

C. Representative images of brains of two-month-old control and *Spag6* KO mice. Hydrocephalus was not identified in any of the mice analyzed in this study.

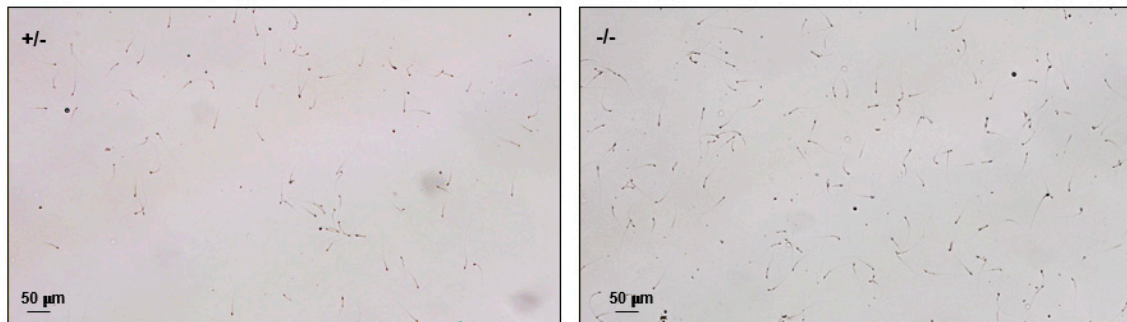

**Supplemental Figure S5. Morphological examination of epididymal sperm of *Spag6* KO mice by light microscopy at low magnification.**

Representative images of sperm at low magnification. Sperm density is similar between the control and the *Spag6* KO mice at the same dilutions.

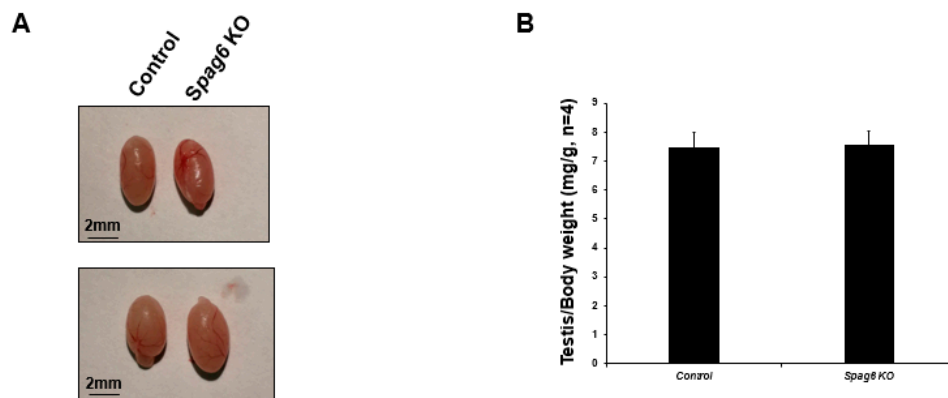

**Supplemental Figure S6. *Spag6* KO mice have normal testis weight.**

A. Representative image showing two pairs of testes from 4-month-old *Spag6* KO mice and their littermates;

B. A statistical analysis to compare the testis weight/body weight between the control and the *Spag6* KO mice.  $n=4$ . No significant difference was found ( $P>0.05$ ).



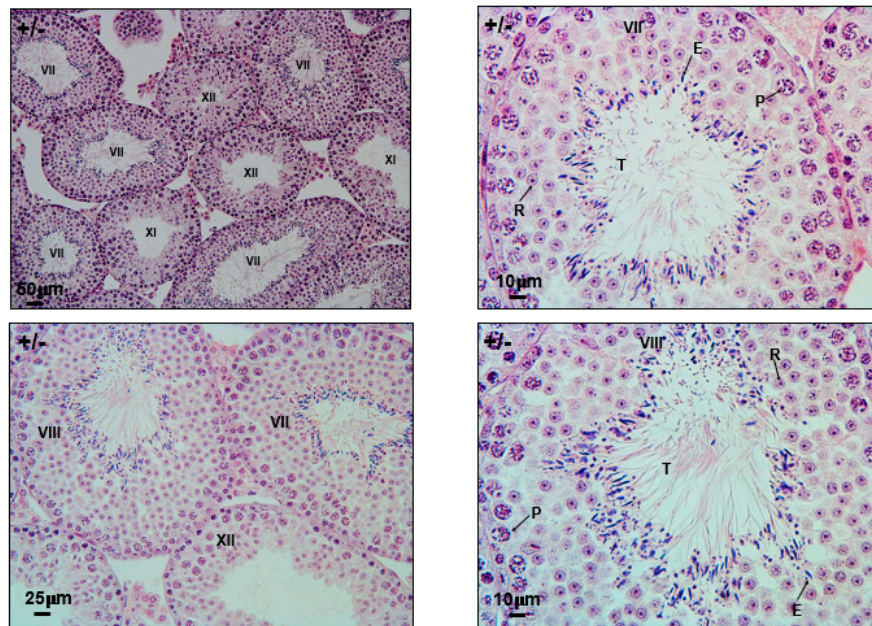

A

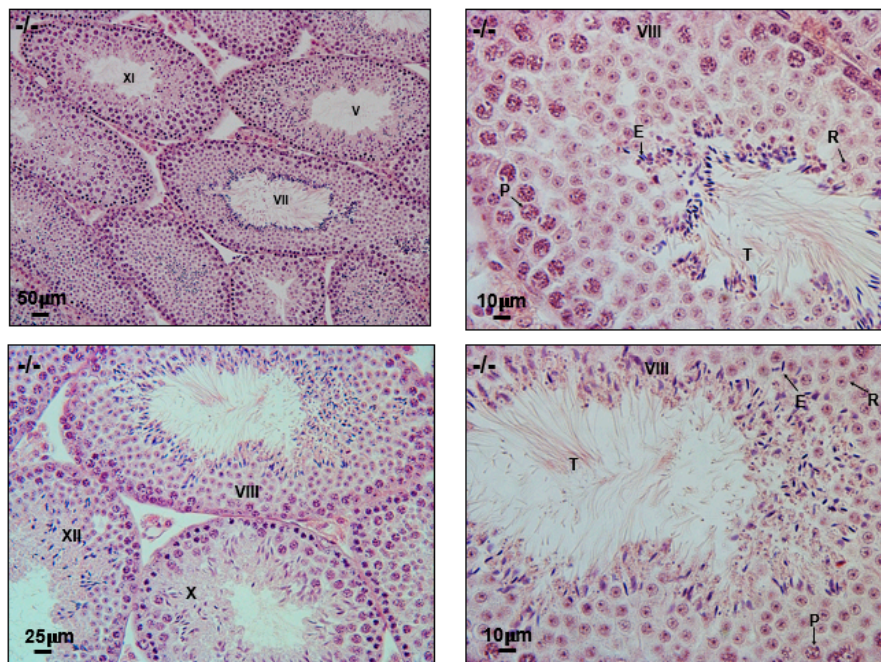

B

**Supplemental Figure S7. Low and high magnification of testis histology.**

Notice that both the control (A) and the *Spag6* KO (B) mice show normal seminiferous tubule structure at low (left) and high (right) magnification. P, pachytene spermatocytes, R, round spermatids, E, elongating spermatids, T, tail of sperm being released.

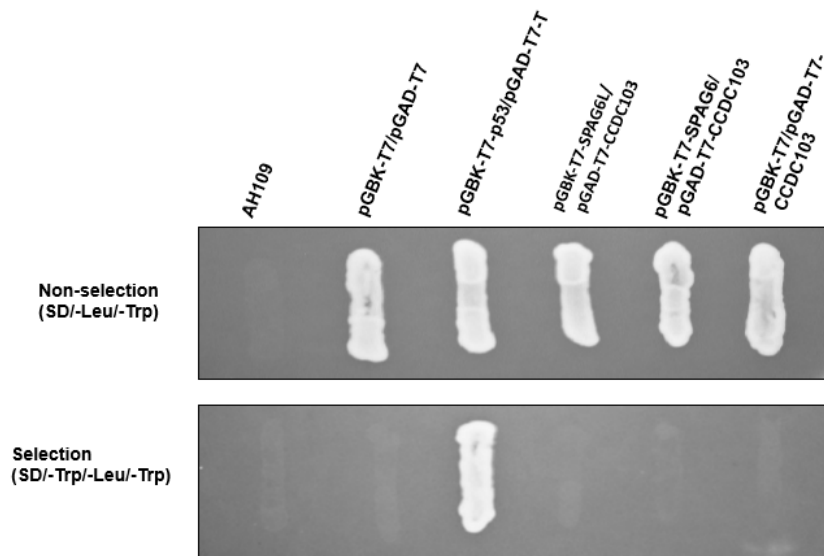

**Supplemental Figure S8. The two mouse SPAG6 proteins do not bind to CCDC103.**

Direct yeast two-hybrid assay to analyze interactions between the two mouse SPAG6 proteins and CCDC103. Neither of the two SPAG6 proteins bind to CCDC103.
